# Supplementary material for: In situ evidence of mineral physical protection and carbon stabilization revealed by nanoscale 3-D tomography
Source: Copernicus journal article supplement (doi:10.5194/bg-15-3133-2018), 2018-05-25
Supplement: Supplementary file 1 [file Supplementary Information Weng BG_509 05042018 figures deleted DOI.pdf › Supplementary Information Weng BG_509 05042018 figures deleted DOI.pdf]

enhance the S/N ratio before 3-D computation. To eliminate the noise surrounding the reconstructed datasets, the *LabelField* function is used to define a 3-D mask for the specimens of interest. The *Arithmetic* function is used to segment the specimens from the surrounding noise according to the 3-D mask. After the above-mentioned post-image processing, the dataset is illustrated using *Voltex* and *Isosurface*. In general, OC is demonstrated by *Voltex* with a proper contrast value, and minerals and gold particles with high intensity are shown by *Isosurface* with a reasonable threshold. Organic C and minerals are bound in the specific spatial region using *SelectRoi*. The *CameraRotate* module is used to show the rotating motion of tomography along a specific axis. The internal structure of the specimen is shown under the *ClippingPlane* module. The *DemoMaker* module is applied to make an animated sequence of operations for advanced movie recording, and *MovieMaker* is used to export the animated operation to a video file.

#### **Supplementary Figure Captions**

**Figure S1.** The flowchart for 3-D tomography reconstruction and subsequent 3-D computation for illustration using TXM. Reconstructed 3-D tomography datasets are generated based on the measured distributions, and 3-D tomography illustration is generated by the image post-process and computation.

1

2 **Figure S2.** The 2-D X-ray absorption-contrast composite image in all focus depths for  
3 OC-mineral consortium from Mt. Nanhua. The grey scale is proportional to the X-ray  
4 attenuation coefficients of different materials. The dark laminal texture pointed by the  
5 white arrow reveals a sheet-like mineral coating on OC surface, which is a dense and  
6 thin layer, likely indicating a high level of physical protection. We propose such texture  
7 originates from adsorption. The red arrow points to the other distinct texture of OC-  
8 mineral nano-aggregates/clusters, with dark minerals in the core and light OC  
9 surrounding, which is not necessarily on the rim. This texture indicates a possible  
10 microsite of OC-mineral co-precipitation. It should be noted that the light region  
11 surrounding the dark region (minerals) could be either OC or air/cavity, as their  
12 attenuation coefficients are very difficult to distinguish from each other in X-ray images.  
13 There are numerous such OC-mineral clusters in the image, with a large, round-shaped  
14 one chosen for illustration purposes. In reality, the OC-mineral clusters can be of any  
15 shape. The scale bar is 3 microns.

16

17 **Figure S3.** A cross-sectional view of the reconstructed 3-D tomography, under  
18 absorption-contrast mode for the OC-mineral consortium from Mt. Nanhua, along the  
19 X-Z plane. The grey scale is inversely proportional to the X-ray attenuation coefficients  
20 of different materials. The white and the red arrows point to the mineral layer and OC-

1 mineral clusters respectively. The yellow arrow points to a potential nucleus for mineral  
2 clusters development that could be a light material such as OC. On the other hand, this  
3 microsite may be a cavity. The scale bar is 3 microns.

4  
5 **Figure S4.** The X-ray diffraction patterns of the particulate OC and the mountain soil.

6 There is a distinct difference between the particulate OC and the mountain soil in  
7 mineralogy as shown in the stacking graph. The major crystal phases in the soil is quartz  
8 (ICDD 0-033-1161), amesite (ICDD 01-080-1772), and muscovite (ICDD 04-012-  
9 1956). The X-ray diffraction pattern also shows a few minor phases in the mountain  
10 soil, such as chlorite (ICDD 01-075-8791), phlogopite (ICDD 00-016-0344), magnetite  
11 (ICDD 01-080-6407), and hematite (ICDD 01-080-5408), but these diffraction peaks  
12 are hardly recognizable due to their low intensity.

#### 13 14 **Supplementary Movie (Video clips) Captions**

15 **Figure SMOV1.** Video illustration extracted from 3-D absorption-contrast tomography  
16 of lab-made BC and mineral nanoparticle consortium. The yellow particle is a gold  
17 nanoparticle for position reference. All minerals are shown in a silver color. The dark  
18 grey part contours the structure and boundary of OC.

19 <https://doi.org/10.5446/36090>

20  
21 **Figure SMOV2.** Video illustration extracted from 3-D phase-contrast tomography of  
22 lab-made BC and mineral nanoparticle consortium. The yellow particle is a gold  
23 nanoparticle for position reference. All minerals are shown in a silver color. The dark

1 grey part contours the structure and boundary of OC.

2 <https://doi.org/10.5446/36091>

3

4 **Figure SMOV3.** Video illustration obtained from 3-D absorption-contrast tomography  
5 of the particulate mineral-bearing OC from the mountain soil. The yellow particle is a  
6 gold nanoparticle for position reference. All minerals are shown in a rust color. The  
7 dark grey part contours the structure and boundary of OC.

8 <https://doi.org/10.5446/36092>

9

1 **Table S1.** XRD peak positions of mineral-bearing OC sample from Mt. Nanhua.

|               | <b>d (Å)</b> | <b>d-reference (Å)</b> | <b>hkl</b> |
|---------------|--------------|------------------------|------------|
| Ferrihydrite  | 2.5644       | 2.5634                 | 100        |
|               | 2.2502       | 2.2504                 | 012        |
|               | 2.0046       | 1.9840                 | 013        |
|               | 1.7344       | 1.7322                 | 014        |
|               | 1.5090       | 1.5160                 | 015        |
|               | 1.4779       | 1.4800                 | 110        |
| Goethite      | 4.9831       | 5.0000                 | 020        |
|               | 4.2063       | 4.2089                 | 110        |
|               | 2.6992       | 2.7071                 | 130        |
|               | 2.5914       | 2.5913                 | 021        |
|               | 2.4595       | 2.4591                 | 111        |
|               | 2.2625       | 2.2624                 | 121        |
|               | 1.7210       | 1.7284                 | 221        |
|               | 1.6990       | 1.7005                 | 240        |
|               | 1.5650       | 1.5706                 | 151        |
|               | 1.5135       | 1.5150                 | 002        |
| Lepidocrocite | 6.2651       | 6.2700                 | 200        |
|               | 3.2921       | 3.2940                 | 210        |
|               | 2.4747       | 2.4730                 | 301        |
|               | 2.4333       | 2.4340                 | 410        |
|               | 2.3616       | 2.3620                 | 111        |
|               | 1.9402       | 1.9400                 | 501        |
|               | 1.9370       | 1.9350                 | 020        |
|               | 1.7367       | 1.7350                 | 511        |
|               | 1.5333       | 1.5340                 | 002        |
|               | 1.5258       | 1.5240                 | 321        |
|               | 1.3684       | 1.3710                 | 521        |
| Quartz        | 4.2532       | 4.254                  | 100        |
|               | 3.3422       | 3.342                  | 101        |
|               | 2.4571       | 2.456                  | 110        |
|               | 2.2806       | 2.280                  | 102        |
|               | 2.2361       | 2.236                  | 111        |
|               | 1.9788       | 1.979                  | 201        |
|               | 1.8173       | 1.817                  | 112        |
|               | 1.6715       | 1.671                  | 202        |

1.5412

1.541

211

1.3818

1.374

203

---

1

2

3

4

5

6

7

8

9

10

11

12

13

14

15

16

17

18

19

20

21

22

23

24

25

26

27

28

29

30

31

32

33

34

35

36

1 **Table S2.** FTIR peak assignment of mineral-bearing OC sample from Mt. Nanhua.

| Wavenumber<br>(cm <sup>-1</sup> ) | Model                                             | Reference                             | Ref.<br>value |
|-----------------------------------|---------------------------------------------------|---------------------------------------|---------------|
| 1758                              | Carbonyl C=O stretching                           | Parikh et al., 2014                   | 1765          |
| 1706                              | Aromatic<br>carbonyl/carboxyl C=O<br>stretching   | Özçimen and Ersoy-<br>Meriçboyu, 2010 | 1709          |
| 1596                              | νC=C in aromatic                                  | Sharma et al., 2004                   | 1597          |
| 1454                              | CH deformation and<br>aromatic ring vibrations    | Sharma et al., 2004                   | 1460          |
| 1386                              | Carboxyl C–O symmetric<br>stretching              | Parikh et al., 2014                   | 1384          |
| 1274                              | Carboxyl C–O stretching                           | Parikh et al., 2014                   | 1280          |
| 1247                              | ν(C–O) phenolic                                   | Parikh et al., 2014                   | 1240          |
| 1113                              | Si–O stretching                                   | Vaculikova et al.,<br>2011            | 1113          |
| 1062                              | Si–O stretching                                   | Harsh et al., 2002                    | 1060          |
| 1025                              | Aliphatic ether C–O and<br>alcohol C–O stretching | Parikh et al., 2014                   | 1029          |
| 910                               | OH deformation                                    | Vaculikova et al.,<br>2011            | 913           |
| 875                               | 1 adjacent H deformation                          | Parikh et al., 2014                   | 870           |
| 798                               | 2 adjacent H deformation                          | Parikh et al., 2014                   | 804           |
| 754                               | 4 adjacent H deformation                          | Parikh et al., 2014                   | 750           |
| 694                               | Fe–OH stretching                                  | Blanch et al. 2008                    | 690           |
| 674                               | In-plane O–H bend                                 | Blanch et al. 2008                    | 670           |
| 626                               | Fe–O stretching                                   | Blanch et al. 2008                    | 633           |
| 534                               | Fe–OH stretching                                  | Blanch et al. 2008                    | 533           |
| 497                               | Fe–O asymmetric<br>stretching                     | Blanch et al. 2008                    | 497           |
| 476                               | Fe–O vibrations                                   | Parikh et al., 2014                   | 480           |

2 (Blanch et al., 2008; Harsh et al., 2002; Özçimen and Ersoy-Meriçboyu, 2010; Parikh  
3 et al., 2014; Sharma et al., 2004; Vaculíková et al., 2011)

4

## 5 **References**

6 Blanch, A., Quinton, J., Lenehan, C., and Pring, A.: The crystal chemistry of Al-

7 bearing goethites: An infrared spectroscopic study, Mineral. Mag., 72, 1043-



1 1056, 2008.

2 Harsh, J., Chorover, J., and Nizeyimana, E.: Allophane and Imogolite, In *Soil*  
3 *Mineralogy with Environmental Applications*, SSSA Book Series No. 7, Edited  
4 by:Dixon,J.B. and Schulze,D.G., Madison, WI:SSSA, pp 291–322, 2002.

5 Özçimen, D. and Ersoy-Meriçboyu, A.: Characterization of biochar and bio-oil  
6 samples obtained from carbonization of various biomass materials, *Renew.*  
7 *Energy*, 35, 1319-1324, 2010.

8 Parikh, S., W. Goyne, K., Margenot, A., Mukome, F., and J. Calderon, F.: *Soil*  
9 *Chemical Insights Provided through Vibrational Spectroscopy*, Elsevier, Oxford,  
10 pp 1–148, 2014.

11 Sharma, R. K., Wooten, J. B., Baliga, V. L., Lin, X., Geoffrey Chan, W., and  
12 Hajaligol, M. R.: Characterization of chars from pyrolysis of lignin, *Fuel*, 83,  
13 1469-1482, 2004.

14 Vaculíková, L., Plevová, E., Vallová, S., and Koutnik, I.: Characterization and  
15 differentiation of kaolinites from selected Czech deposits using infrared  
16 spectroscopy and differential thermal analysis, *Acta Geodyn. Geomater.*, 8, 59–  
17 67, 2011.

18
