# Supplementary material for: In situ evidence of mineral physical protection and carbon stabilization revealed by nanoscale 3-D tomography
Source: Copernicus journal article supplement (doi:10.5194/bg-15-3133-2018), 2018-05-25
Supplement: Supplementary file [file bg-15-3133-2018-supplement-title-page.pdf › bg-15-3133-2018-supplement-title-page.pdf]

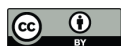

## *Supplement of*

# **In situ evidence of mineral physical protection and carbon stabilization revealed by nanoscale 3-D tomography**

**Yi-Tse Weng et al.**

*Correspondence to:* Biqing Liang ([liangbq@mail.ncku.edu.tw](mailto:liangbq@mail.ncku.edu.tw))

- [bg-15-3133-2018-supplement-title-page.pdf](#)
- BG509 Weng Supplementary Figures
  - [figS01.png](#)
  - [figS02.png](#)
  - [figS03.png](#)
  - [figS04.png](#)
- [Supplementary Information Weng BG\\_509 05042018 figures deleted DOI.pdf](#)

The copyright of individual parts of the supplement might differ from the CC BY 4.0 License.
